# Supplementary material for: The BH3-only proteins BIM and PUMA are not critical for the reticulocyte apoptosis caused by loss of the pro-survival protein BCL-XL
Source: PubMed Central journal article supplement (PMC5550852; doi:10.1038/cddis.2017.304), 2017-07-06

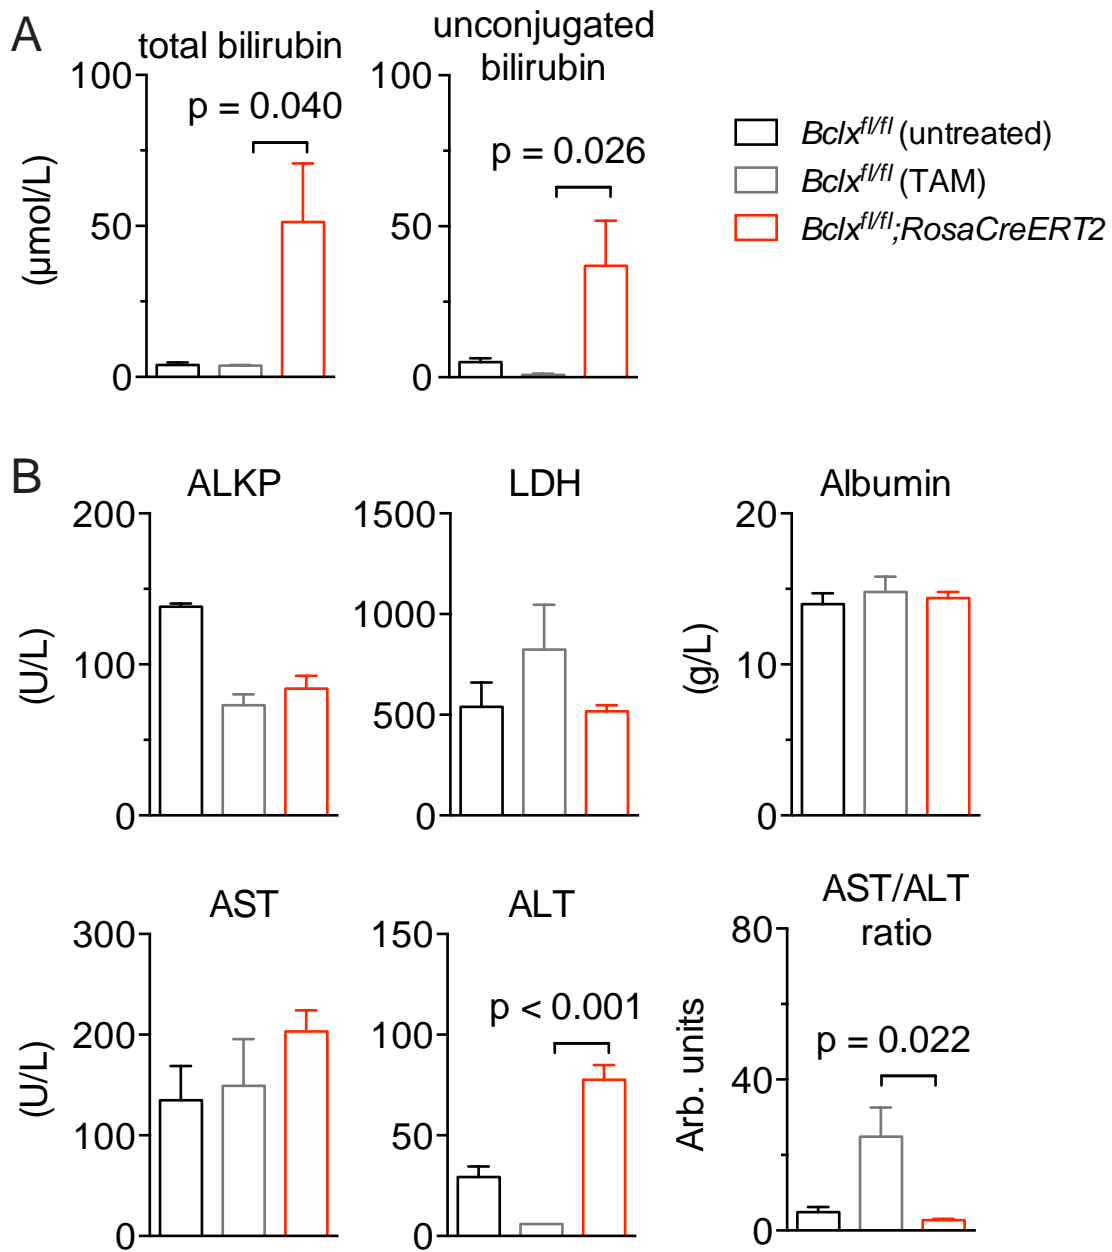

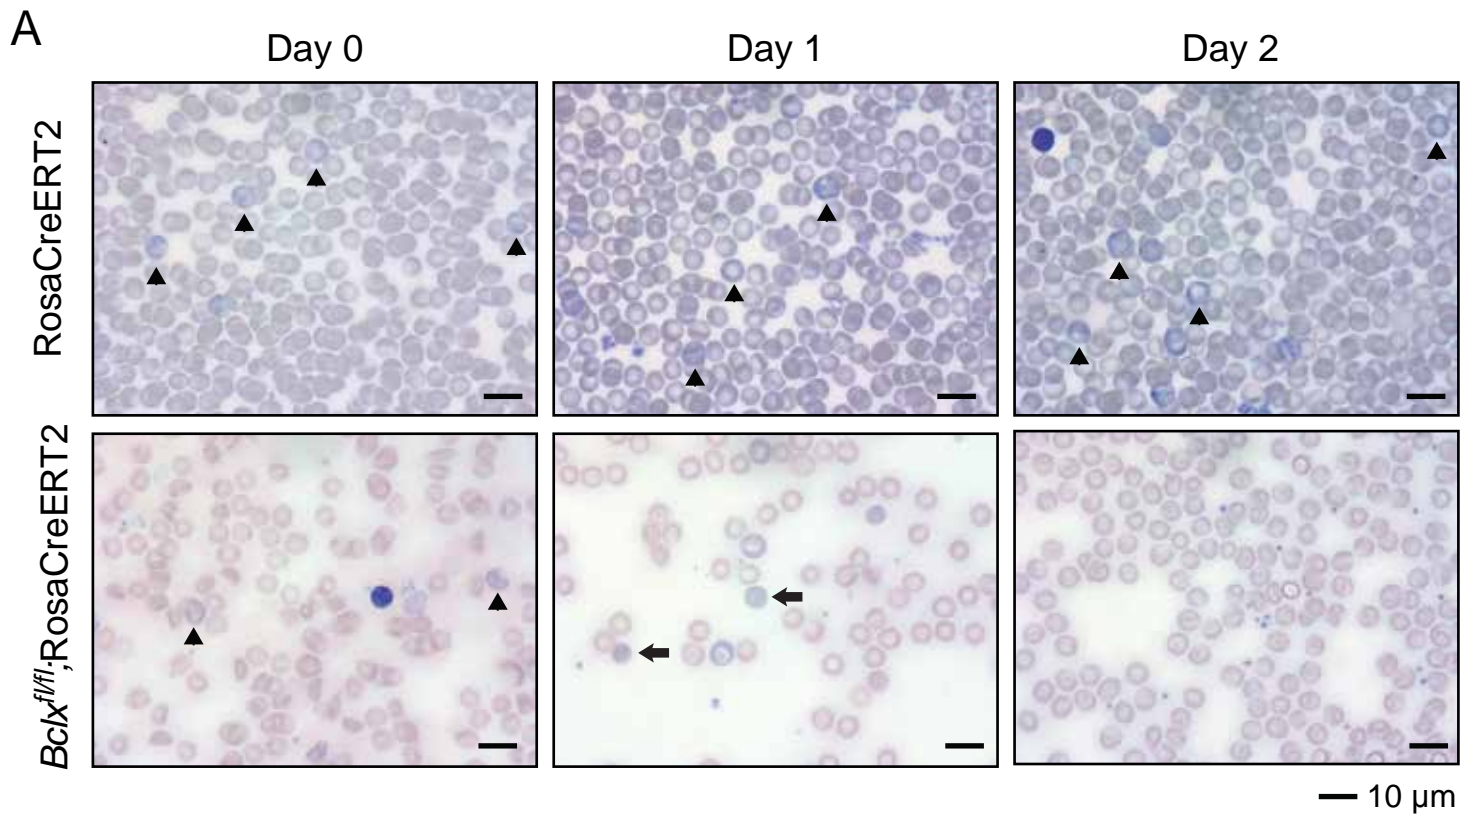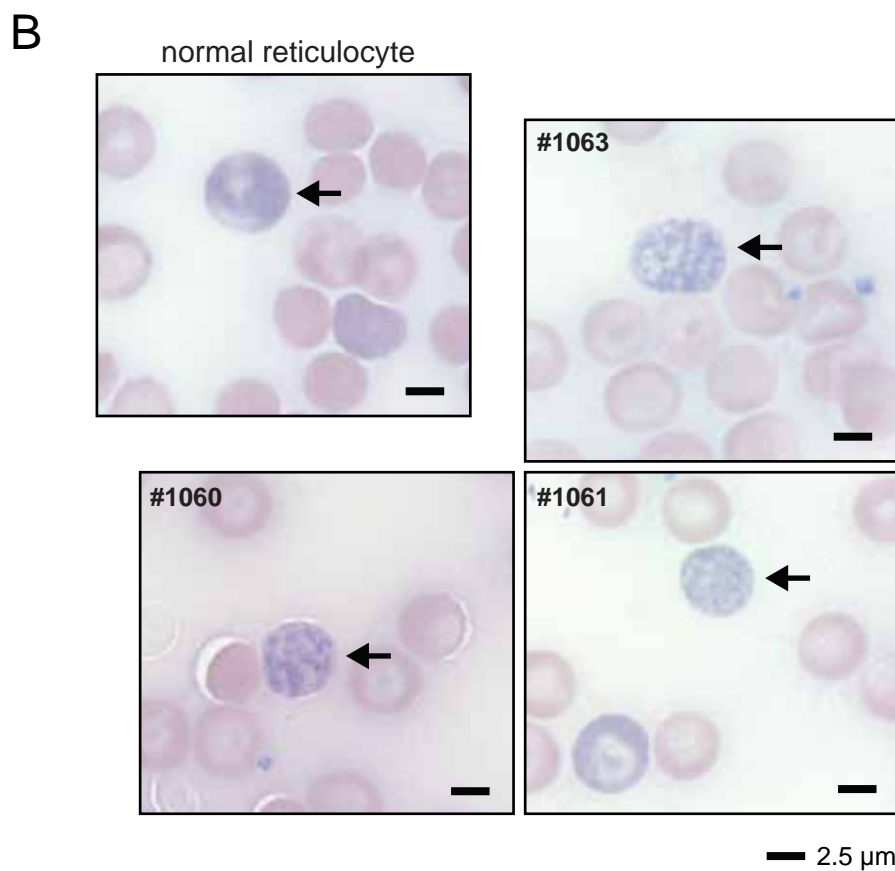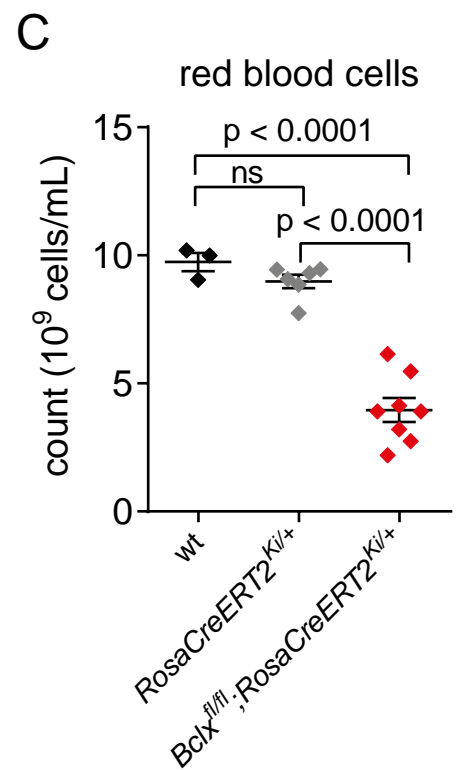

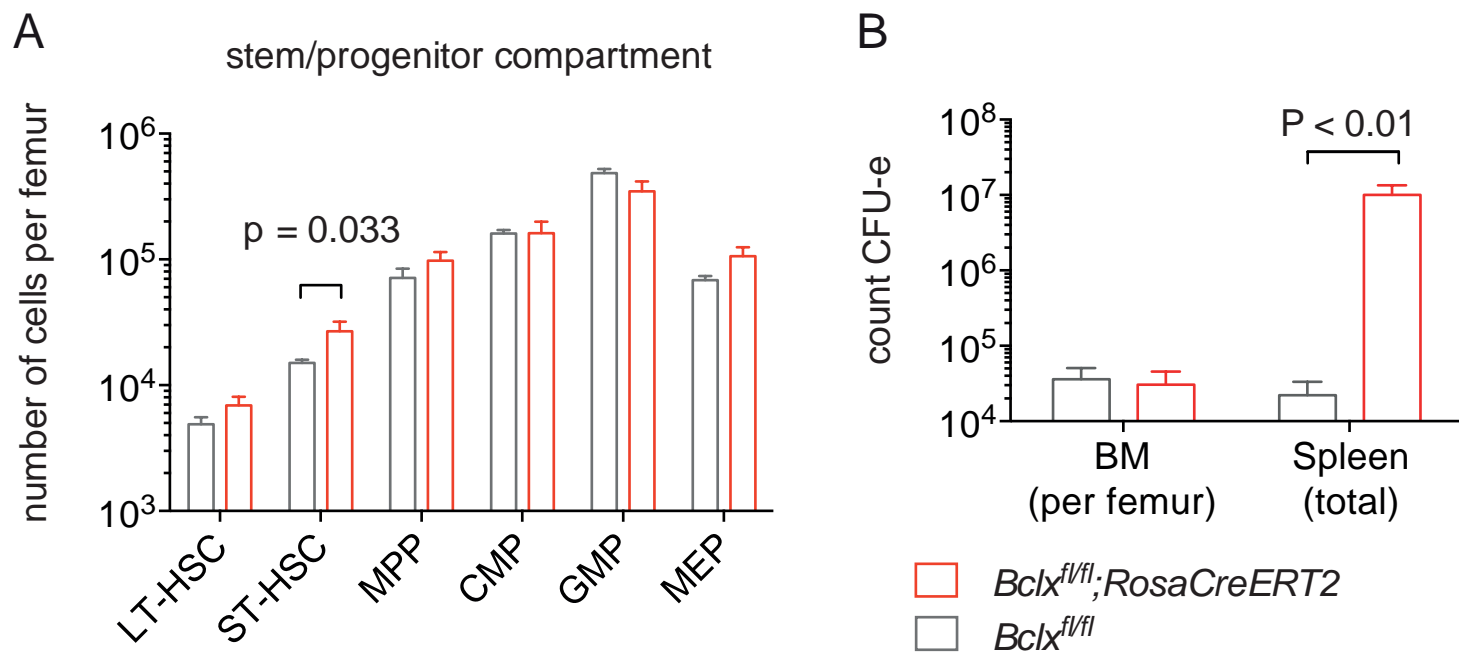

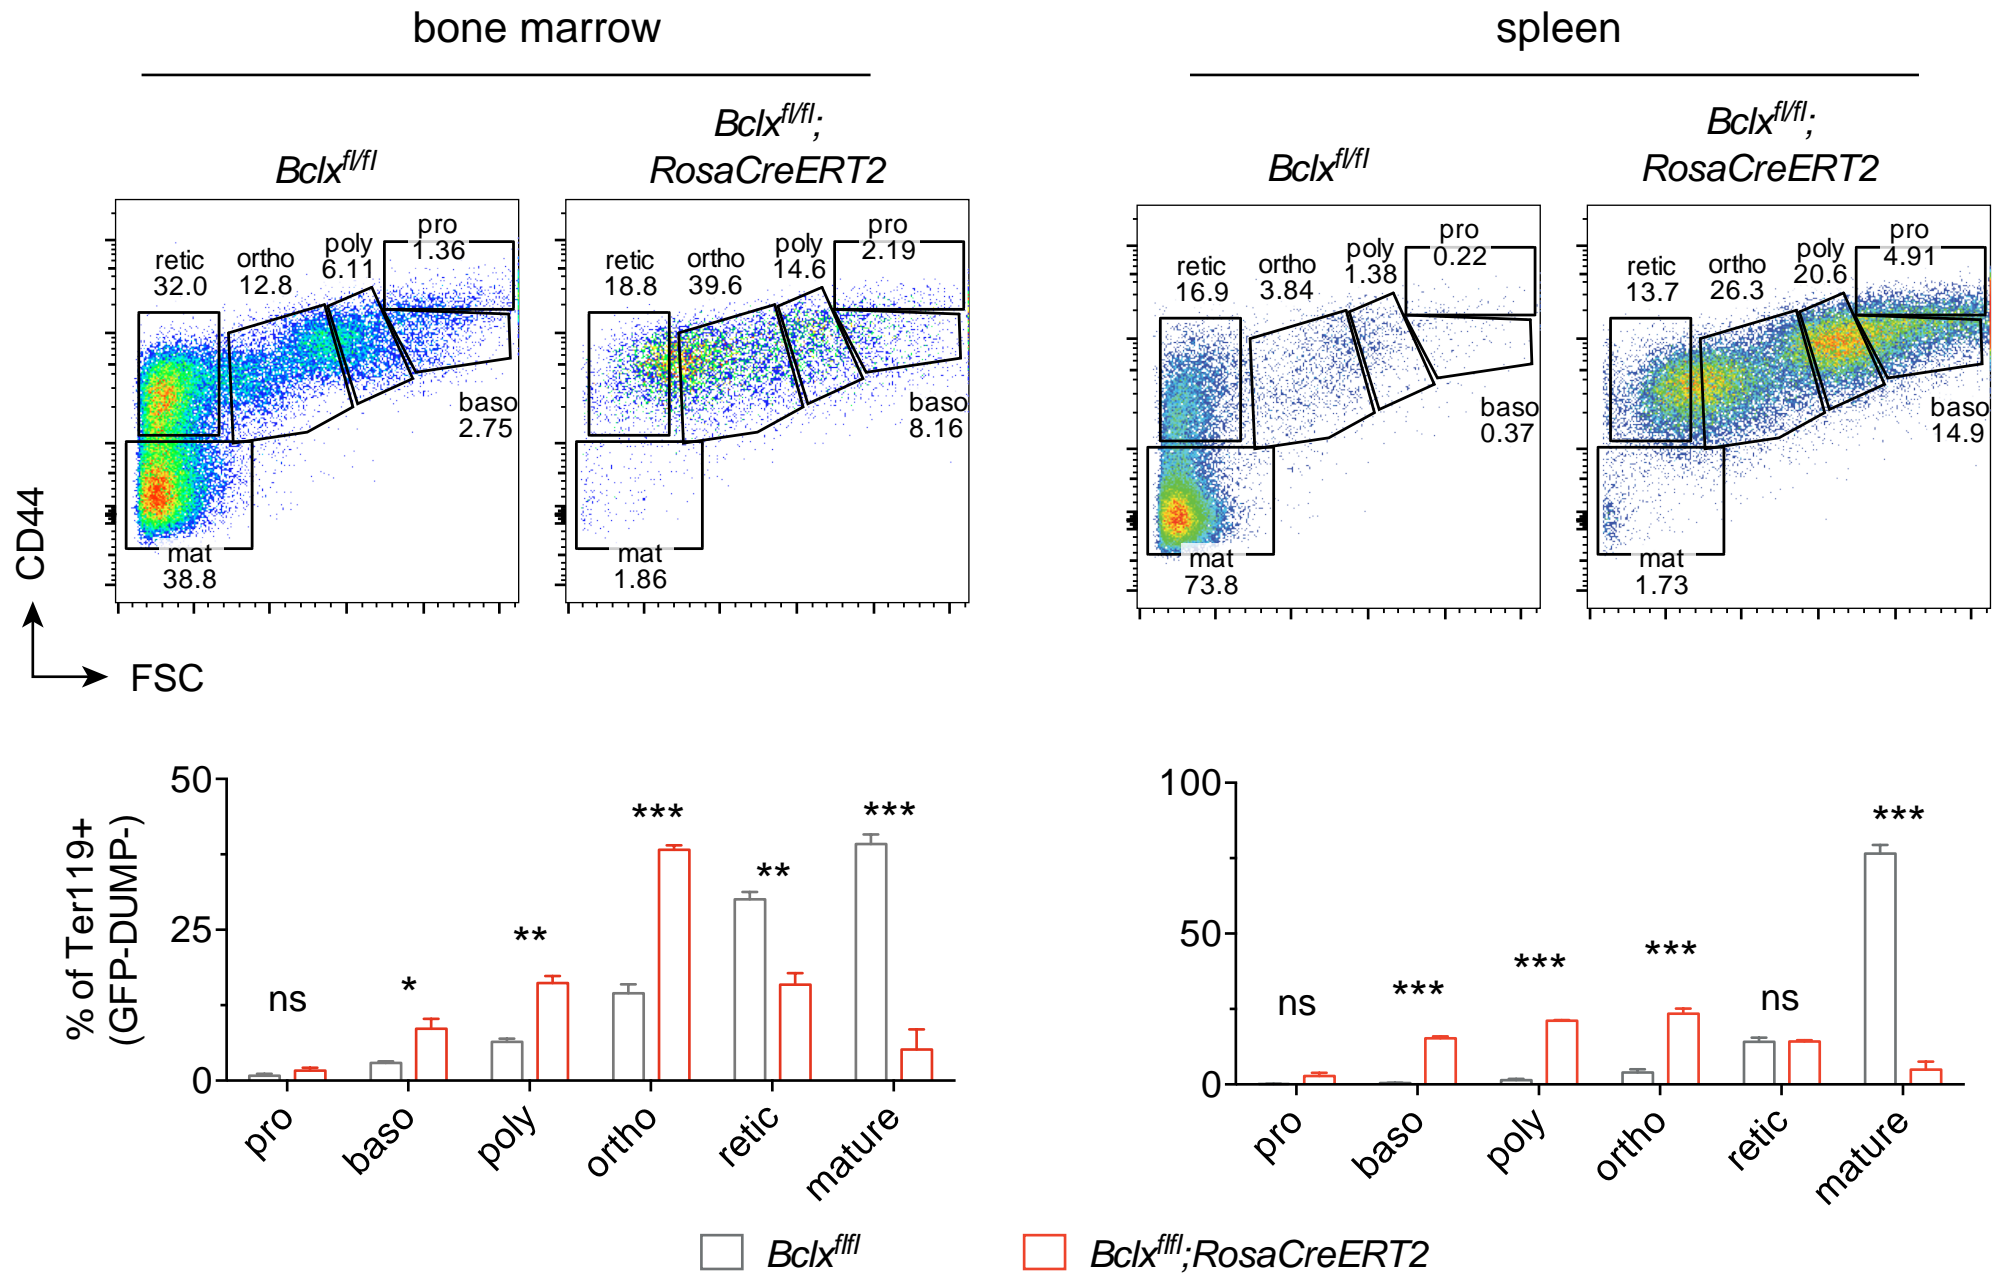

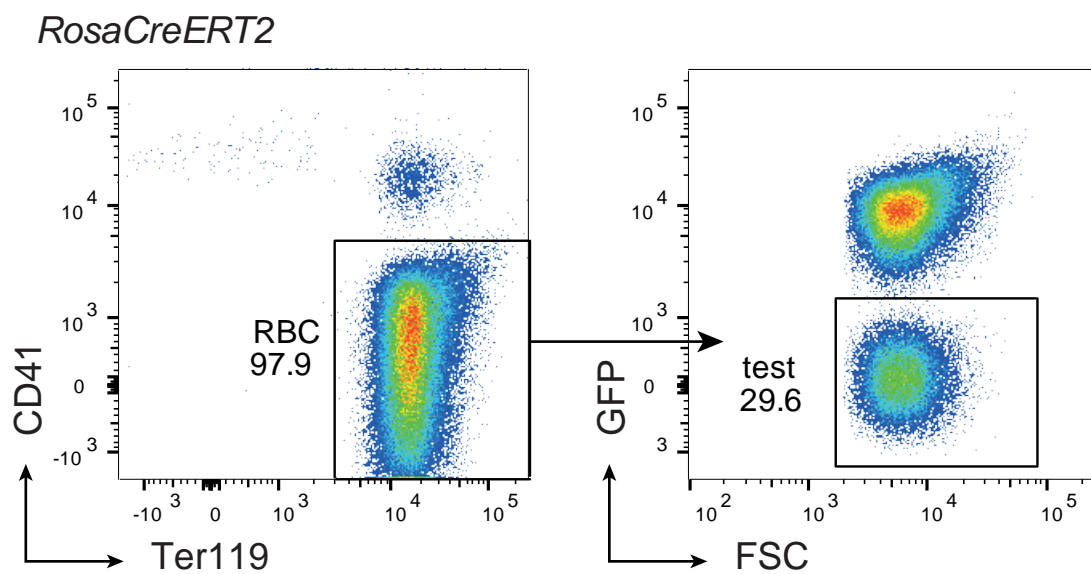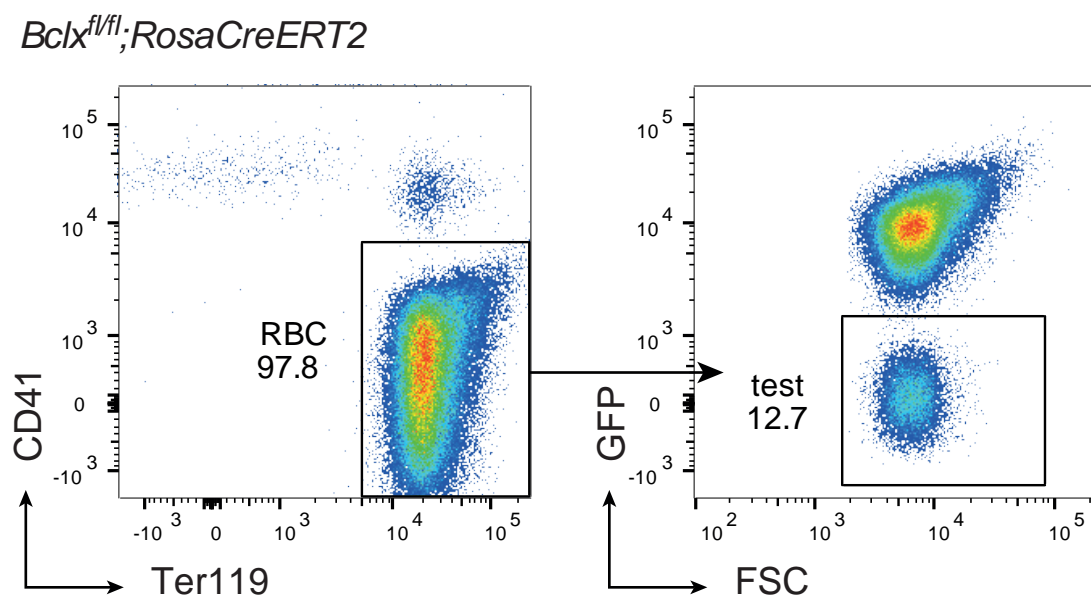

Supplement: cddis2017304x1.pdf [file cddis2017304x1.pdf]
